# Supplementary material for: Predicting the impacts of mutations on protein-ligand binding affinity based on molecular dynamics simulations and machine learning methods
Source: PubMed Central journal article supplement — Comput Struct Biotechnol J. 2020 Feb 20;18:439–54. doi: 10.1016/j.csbj.2020.02.007 (PMC7052406; doi:10.1016/j.csbj.2020.02.007), 2020-02-20
Supplement: mmc2.pdf [file mmc2.pdf]

| Mutation                          | Mutant_PDB_ID | Wildtype_Protein_PDB_ID | Ligand_ID_in_PDB | Multiple_Binding_Sites | Impact_of_Mutation_on_Binding_Affinity | Fold_Change |
|-----------------------------------|---------------|-------------------------|------------------|------------------------|----------------------------------------|-------------|
| G48H                              | 1A9M          | 1GNO                    | U0E              | No                     | Decreased Affinity                     | -5.95       |
| V82F                              | 1BWA          | 1BV9                    | XV6              | No                     | Decreased Affinity                     | -22.7272727 |
| L22Y                              | 1DLS          | 1U72                    | MTX              | No                     | Decreased Affinity                     | -3205.88235 |
| Y101F                             | 1E2L          | 1E2K                    | TMC              | No                     | Decreased Affinity                     | -4.51754386 |
| V82D                              | 1GNM          | 1GNO                    | U0E              | No                     | Decreased Affinity                     | -28         |
| V82N                              | 1GNN          | 1GNO                    | U0E              | No                     | Decreased Affinity                     | -105        |
| R218H                             | 1HK2          | 1HK1                    | T44              | Yes                    | Increased Affinity                     | 13.52941176 |
| R218P                             | 1HK3          | 1HK1                    | T44              | Yes                    | Increased Affinity                     | 8.846153846 |
| R218H                             | 1HK5          | 1HK4                    | T44              | No                     | Decreased Affinity                     | -1.16734694 |
| C59R/<br>S108N                    | 1J3J          | 3QGT                    | CP6              | No                     | Decreased Affinity                     | -49         |
| N51I/<br>C59R/<br>S108N/<br>I164L | 1J3K          | 1J3I                    | WRA              | No                     | Decreased Affinity                     | -3.36363636 |
| K213E                             | 1JQV          | 2DOR                    | ORO              | No                     | Decreased Affinity                     | -4.03448276 |
| R57A                              | 1JQX          | 2DOR                    | ORO              | No                     | Decreased Affinity                     | -3.27586207 |
| P56A                              | 1JRB          | 2DOR                    | ORO              | No                     | Decreased Affinity                     | -50         |
| N67A                              | 1JRC          | 2DOR                    | ORO              | No                     | Decreased Affinity                     | -1.51724138 |
| F93A                              | 1MGO          | 1HLD                    | PFB              | No                     | Decreased Affinity                     | -17         |
| V292T                             | 1N8K          | 1N92                    | NAJ              | No                     | Decreased Affinity                     | -30         |
| N229C                             | 1NJA          | 1NJE                    | DCM              | No                     | Increased Affinity                     | 600         |
| N229D                             | 1NJC          | 1NJE                    | DCM              | No                     | Increased Affinity                     | 20          |
| W57L                              | 1OBO          | 1FLV                    | FMN              | No                     | Decreased Affinity                     | -25.8461539 |
| Y94F                              | 1OBV          | 1FLV                    | FMN              | No                     | Decreased Affinity                     | -4          |
| K136E                             | 1OVD          | 2DOR                    | ORO              | No                     | Increased Affinity                     | 3.815789474 |
| L90M                              | 1SDU          | 1SDT                    | MK1              | No                     | Increased Affinity                     | 6.279069767 |
| V82A                              | 1SDV          | 1SDT                    | MK1              | No                     | Decreased Affinity                     | -3.35185185 |
| Y187F                             | 1SYI          | 1SYH                    | CPW              | No                     | Decreased Affinity                     | -8.47328244 |
| S96P                              | 1TPW          | 1TPH                    | PGH              | No                     | Decreased Affinity                     | -14.2       |
| L22R                              | 1U70          | 1U72                    | MTX              | No                     | Decreased Affinity                     | -1344.11765 |
| W92A                              | 1W6Y          | 1OH0                    | EQU              | No                     | Decreased Affinity                     | -2.2        |
| S292Q                             | 1X7W          | 1U5B                    | TDP              | No                     | Decreased Affinity                     | -38.0625    |
| S292E                             | 1X7X          | 1U5B                    | TDP              | No                     | Decreased Affinity                     | -32.875     |
| S292N                             | 1X7Y          | 1U5B                    | TDP              | No                     | Decreased Affinity                     | -34         |
| S292D                             | 1X7Z          | 1U5B                    | TDP              | No                     | Decreased Affinity                     | -25.1875    |
| I219A                             | 1YDK          | 1K3L                    | GTX              | No                     | Decreased Affinity                     | -18.5714286 |
| Y408C                             | 1YKL          | 3PCA                    | DHB              | No                     | Decreased Affinity                     | -22.8       |
| Y408H                             | 1YKP          | 3PCA                    | DHB              | No                     | Decreased Affinity                     | -15.6       |
| Y120F                             | 1YP6          | 1QY1                    | PRZ              | No                     | Decreased Affinity                     | -6.63333333 |
| A328V                             | 1ZOA          | 1JPZ                    | 140              | No                     | Increased Affinity                     | 7.111111111 |
| D597N                             | 1ZZQ          | 1P6J                    | DP9              | No                     | Decreased Affinity                     | -200        |
| D597N/<br>M336V                   | 1ZZR          | 1P6J                    | DP9              | No                     | Decreased Affinity                     | -420        |
| N368D                             | 1ZZS          | 1P6N                    | DP9              | No                     | Increased Affinity                     | 21.56862745 |
| N368D/<br>V106M                   | 1ZZT          | 1P6N                    | DP9              | No                     | Increased Affinity                     | 100         |
| D597N/<br>M336V                   | 1ZZU          | 1P6H                    | DP1              | No                     | Decreased Affinity                     | -211        |
| R21L                              | 2CAQ          | 2CA8                    | GSH              | No                     | Decreased Affinity                     | -12.9545455 |
| Y10F                              | 2F8F          | 2CA8                    | GSH              | No                     | Increased Affinity                     | 1.047619048 |
| V82A                              | 2IDW          | 2IEN                    | 17               | No                     | Decreased Affinity                     | -1.3        |
| I84V                              | 2IEO          | 2IEN                    | 17               | No                     | Decreased Affinity                     | -3.2        |
| C298A/<br>W219Y                   | 2IPW          | 2IS7                    | 2CL              | No                     | Increased Affinity                     | 4.4         |

|                         |      |      |     |    |                    |             |
|-------------------------|------|------|-----|----|--------------------|-------------|
| C298A/<br>W219Y         | 2ISF | 2INE | PAC | No | Decreased Affinity | -3.75       |
| N199A                   | 2OGY | 2E7F | C2F | No | Decreased Affinity | -2.65       |
| K57A                    | 2ONZ | 2ONY | TMJ | No | Increased Affinity | 161.5384615 |
| V47I                    | 2PD9 | 1PWM | FID | No | Decreased Affinity | -1.27503839 |
| F121P                   | 2PDC | 2PZN | 393 | No | Decreased Affinity | -6.44186556 |
| L300P                   | 2PDH | 2PDG | 47D | No | Decreased Affinity | -6.44186556 |
| L300A                   | 2PDJ | 2PZN | 393 | No | Decreased Affinity | -2.15852453 |
| L301M                   | 2PDL | 2FZD | TOL | No | Decreased Affinity | -2.75220163 |
| S302R                   | 2PDN | 2PDG | 47D | No | Decreased Affinity | -109.6772   |
| S302R                   | 2PDP | 2PZN | 393 | No | Decreased Affinity | -70.2517332 |
| C303D                   | 2PDQ | 2PDG | 47D | No | Decreased Affinity | -57.3747748 |
| C303D                   | 2PDU | 2PZN | 393 | No | Decreased Affinity | -64.7862173 |
| C303D                   | 2PDW | 1PWM | FID | No | Decreased Affinity | -5.70492615 |
| S302R/<br>C303D         | 2PDY | 1PWM | FID | No | Decreased Affinity | -24.5126117 |
| N88D                    | 2PYM | 2Q64 | 1UN | No | Decreased Affinity | -12.8571429 |
| A71V                    | 2PYN | 2Q64 | 1UN | No | Decreased Affinity | -5          |
| L90M                    | 2Q63 | 2Q64 | 1UN | No | Decreased Affinity | -7.07142857 |
| D30N                    | 2QCI | 2Z4O | 65  | No | Decreased Affinity | -17.037037  |
| I50V                    | 2QD6 | 2Z4O | 65  | No | Decreased Affinity | -7.77777778 |
| V82A                    | 2QD7 | 2Z4O | 65  | No | Decreased Affinity | -2.96296296 |
| I84V                    | 2QD8 | 2Z4O | 65  | No | Decreased Affinity | -3.14814815 |
| E88G/<br>N92L           | 2YGE | 1A4H | GDM | No | Decreased Affinity | -8.41328413 |
| L89V/<br>L93I/<br>V136M | 2YGF | 1A4H | GDM | No | Decreased Affinity | -1.70848709 |
| M372A/<br>K316A         | 3AM5 | 3AM3 | TCL | No | Decreased Affinity | -1.35714286 |
| G48V                    | 3CYW | 3TKW | 17  | No | Decreased Affinity | -29.3103448 |
| I54M                    | 3D1Z | 3TKW | 17  | No | Decreased Affinity | -2.75862069 |
| I54V                    | 3D20 | 3TKW | 17  | No | Decreased Affinity | -8.62068966 |
| Y43F                    | 3DGO | 3DGL | ATP | No | Increased Affinity | 1.388888889 |
| Q35K                    | 3F8Y | 3FS6 | DH1 | No | Increased Affinity | 27.71084337 |
| Q35S/<br>N64S           | 3F8Z | 3FS6 | DH1 | No | Increased Affinity | 3.484848485 |
| Q35K/<br>N64F           | 3F91 | 3FS6 | DH1 | No | Increased Affinity | 17.69230769 |
| F98Y                    | 3FRA | 3FRF | XCF | No | Decreased Affinity | -20         |
| F98Y                    | 3FRB | 3FRE | TOP | No | Decreased Affinity | -16.6666667 |
| F98Y                    | 3FY8 | 3FYW | XCF | No | Decreased Affinity | -3.91304348 |
| F98Y                    | 3FY9 | 3FYV | XCF | No | Decreased Affinity | -15.9090909 |
| D816H                   | 3G0F | 3G0E | B49 | No | Decreased Affinity | -1.1        |
| L308V                   | 3GUG | 3C3U | C2U | No | Decreased Affinity | -13.220339  |
| T113C                   | 3LBO | 1US0 | LDT | No | Increased Affinity | 13.07769009 |
| T113S                   | 3LD5 | 1US0 | LDT | No | Decreased Affinity | -5.36181466 |
| T113C                   | 3LEP | 2IKI | 388 | No | Decreased Affinity | -1.27020982 |
| T113A                   | 3LQG | 2IKI | 388 | No | Decreased Affinity | -3.71532999 |
| T113A                   | 3LQL | 1US0 | LDT | No | Decreased Affinity | -7.55911261 |
| T113V                   | 3LZ5 | 1US0 | LDT | No | Decreased Affinity | -3.6434088  |
| N88S                    | 3LZU | 3LZS | 17  | No | Decreased Affinity | -7.98165138 |
| T113V                   | 3M4H | 2IKI | 388 | No | Decreased Affinity | -13.4692591 |
| A467G                   | 3MOE | 3DT7 | SPV | No | Decreased Affinity | -1.92307692 |
| V32I                    | 3NU4 | 3NU3 | 478 | No | Decreased Affinity | -10         |
| I50V                    | 3NU5 | 3NU3 | 478 | No | Decreased Affinity | -30         |
| I54M                    | 3NU6 | 3NU3 | 478 | No | Decreased Affinity | -3.33333333 |
| I84V                    | 3NU9 | 3NU3 | 478 | No | Decreased Affinity | -6          |

|                                                     |      |      |     |     |                    |             |
|-----------------------------------------------------|------|------|-----|-----|--------------------|-------------|
| I54V                                                | 3NUJ | 3NU3 | 478 | No  | Decreased Affinity | -2.73333333 |
| L90M                                                | 3NUO | 3NU3 | 478 | No  | Decreased Affinity | -1.06666667 |
| T90S/<br>W108V/<br>L110T/<br>F29L/<br>S52G/<br>R53S | 3RDO | 3RY2 | BTN | No  | Decreased Affinity | -215.384615 |
| S35K                                                | 3S3V | 3NOH | TOP | Yes | Increased Affinity | 1.056506849 |
| A16V/<br>S108T                                      | 3UM6 | 3UM8 | 1CY | No  | Decreased Affinity | -948.75     |
