# Supplementary figures and images for: Predicting the impacts of mutations on protein-ligand binding affinity based on molecular dynamics simulations and machine learning methods
Source: PubMed Central journal article supplement — Comput Struct Biotechnol J. 2020 Feb 20;18:439–54. doi: 10.1016/j.csbj.2020.02.007 (PMC7052406; doi:10.1016/j.csbj.2020.02.007), 2020-02-20

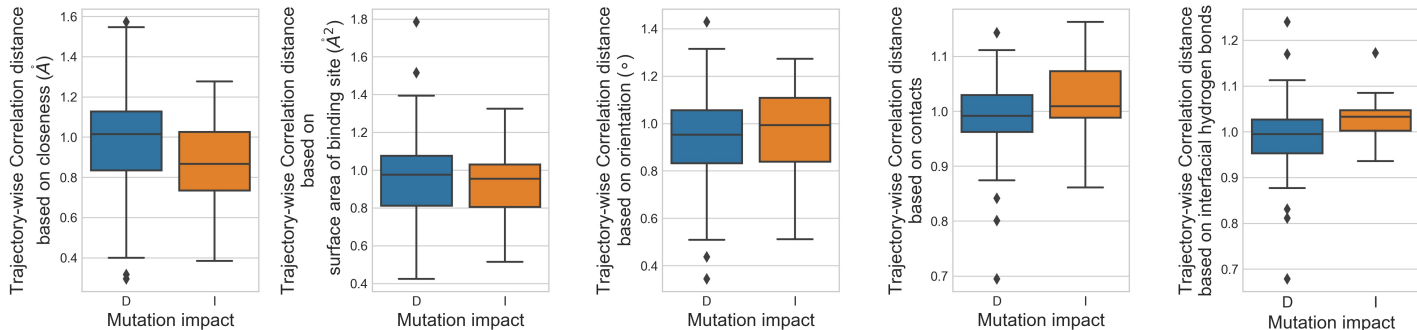

(a)

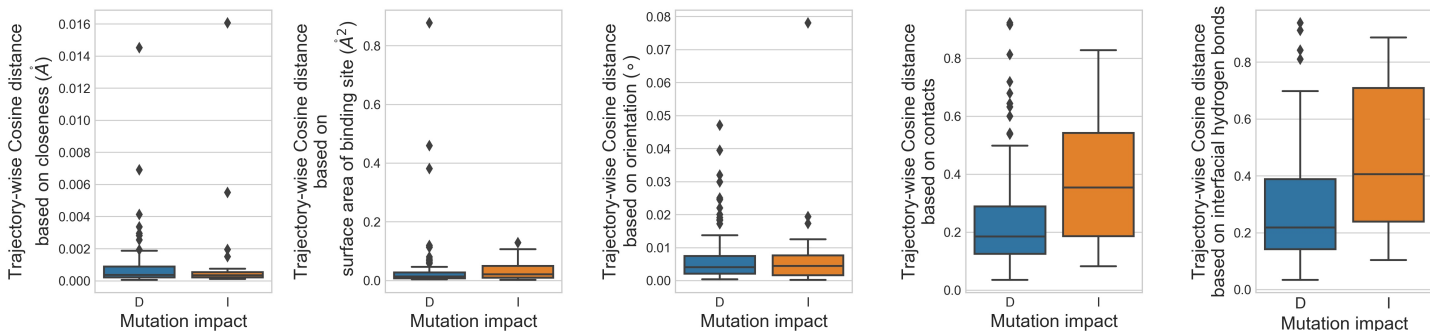

(b)

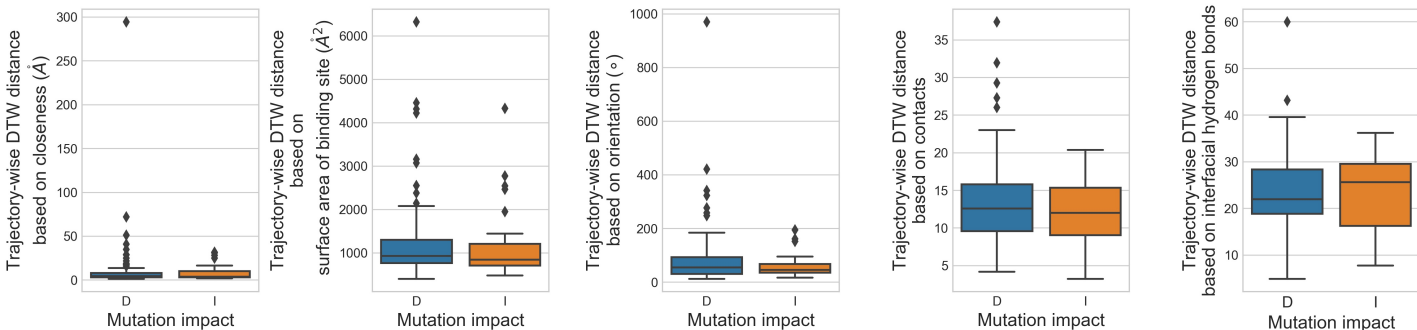

(c)

Supplement: mmc1.pdf [file mmc1.pdf]
